# Supplementary material
Source: ML conference proceedings conference paper supplement (https://openaccess.thecvf.com/content/CVPR2023/html/Mohammadi_Ranking_Regularization_for_CVPR_2023_paper.html)
Supplement: Supplementary file 1 [file Mohammadi_Ranking_Regularization_for_CVPR_2023_supplemental.pdf]

## A. Additional Results

| Binary CIFAR10, imb. 1:200 |                  |                  |                  |             |
|----------------------------|------------------|------------------|------------------|-------------|
| Methods                    | FPR@ ↓<br>98%TPR | FPR@ ↓<br>95%TPR | FPR@ ↓<br>92%TPR | AUC ↑       |
| BCE                        | 75.0             | 55.0             | 40.0             | 87.3        |
| +ALM                       | 70.0             | 54.0             | 39.0             | 86.7        |
| +RankReg                   | <b>67.3</b>      | <b>52.7</b>      | <b>37.8</b>      | <b>89.6</b> |
| S-ML                       | 75.0             | 54.0             | <b>35.0</b>      | 87.4        |
| +ALM                       | 72.0             | 52.0             | 39.0             | 87.9        |
| +RankReg                   | <b>65.8</b>      | <b>51.8</b>      | 41.3             | <b>88.2</b> |
| S-FL                       | 78.0             | 59.0             | 43.0             | 85.7        |
| +ALM                       | 74.0             | 55.0             | 41.0             | 86.9        |
| +RankReg                   | <b>70.5</b>      | <b>46.5</b>      | <b>40.2</b>      | <b>87.7</b> |
| A-ML                       | 74.0             | 56.0             | 39.0             | 87.4        |
| +ALM                       | 75.0             | 54.0             | 35.0             | 87.6        |
| +RankReg                   | <b>64.9</b>      | <b>50.4</b>      | <b>38.1</b>      | <b>89.2</b> |
| A-FL                       | 76.0             | 59.0             | 40.0             | 86.2        |
| +ALM                       | 78.0             | 57.0             | 37.0             | 87.0        |
| +RankReg                   | <b>68.6</b>      | <b>53.6</b>      | <b>35.6</b>      | <b>88.4</b> |
| CB-BCE                     | 87.0             | 74.0             | 61.0             | 78.0        |
| +ALM                       | 85.0             | 69.0             | 53.0             | 80.0        |
| +RankReg                   | <b>72.0</b>      | <b>54.8</b>      | <b>44.5</b>      | <b>87.1</b> |
| W-BCE                      | 88.0             | 75.0             | 62.0             | 78.3        |
| +ALM                       | 83.0             | 69.0             | 54.0             | 81.0        |
| +RankReg                   | <b>66.3</b>      | <b>49.6</b>      | <b>39.5</b>      | <b>89.4</b> |
| LDAM                       | 78.0             | 63.0             | 45.0             | 86.4        |
| +ALM                       | 73.0             | 61.0             | 43.0             | 85.6        |
| +RankReg                   | <b>65.8</b>      | <b>47.3</b>      | <b>33.8</b>      | <b>89.7</b> |
| Avg. Δ                     | 8.2              | 8.0              | 3.2              | 3.1         |

Table 1. Comparison results for binary imbalanced CIFAR-10 showing FPRs at {98%, 95%, 92%} TPRs. Baseline numbers are quoted from ALM [1]. “+ALM” and “+RankReg” are shorthand for *BaseLoss*+ALM and *BaseLoss*+RankReg, respectively.

| Binary CIFAR100, imb. 1:200 |                  |                  |                  |             |
|-----------------------------|------------------|------------------|------------------|-------------|
| Methods                     | FPR@ ↓<br>98%TPR | FPR@ ↓<br>95%TPR | FPR@ ↓<br>90%TPR | AUC ↑       |
| BCE                         | 94.0             | 77.0             | 61.0             | 79.1        |
| +ALM                        | 87.0             | <b>66.0</b>      | 57.0             | 80.9        |
| +RankReg                    | <b>85.2</b>      | 66.8             | <b>43.0</b>      | <b>83.1</b> |
| S-ML                        | 95.0             | 75.0             | 64.0             | 79.7        |
| +ALM                        | 87.0             | 73.0             | 55.0             | 80.7        |
| +RankReg                    | <b>81.8</b>      | <b>62.8</b>      | <b>48.4</b>      | <b>82.4</b> |
| S-FL                        | 90.0             | 78.0             | 50.0             | 80.1        |
| +ALM                        | 85.0             | 76.0             | 50.0             | 80.8        |
| +RankReg                    | <b>79.2</b>      | <b>65.8</b>      | <b>47.2</b>      | <b>83.1</b> |
| A-ML                        | 95.0             | 75.0             | 66.0             | 79.8        |
| +ALM                        | 92.0             | 63.0             | 45.0             | 81.0        |
| +RankReg                    | <b>86.2</b>      | <b>59.0</b>      | <b>43.0</b>      | <b>83.4</b> |
| A-FL                        | 91.0             | 78.0             | 50.0             | 80.0        |
| +ALM                        | 88.0             | 76.0             | 46.0             | 80.7        |
| +RankReg                    | <b>81.2</b>      | <b>58.8</b>      | <b>37.8</b>      | <b>83.7</b> |
| CB-BCE                      | 93.0             | 78.0             | 51.0             | 78.7        |
| +ALM                        | <b>85.0</b>      | 66.0             | 44.0             | 81.0        |
| +RankReg                    | 85.0             | <b>64.0</b>      | <b>40.4</b>      | <b>81.4</b> |
| W-BCE                       | 95.0             | 63.0             | 51.0             | 79.7        |
| +ALM                        | 79.0             | 62.0             | 44.0             | 81.3        |
| +RankReg                    | <b>69.9</b>      | <b>51.4</b>      | <b>41.6</b>      | <b>84.3</b> |
| LDAM                        | 80.0             | 67.0             | 45.0             | 82.1        |
| +ALM                        | 84.0             | 61.0             | 46.0             | 81.5        |
| +RankReg                    | <b>70.2</b>      | <b>56.8</b>      | <b>37.4</b>      | <b>84.1</b> |
| Avg. Δ                      | 5.5              | 7.2              | 6.0              | 2.1         |

Table 2. Comparison results for binary imbalanced CIFAR-100 showing FPRs at {98%, 95%, 90%} TPRs. Baseline numbers are quoted from ALM [1]. “+ALM” and “+RankReg” are shorthand for *BaseLoss*+ALM and *BaseLoss*+RankReg, respectively.

## References

- [1] Sara Sangalli, Ertunc Erdil, Andreas Hoetker, Olivio Donati, and Ender Konukoglu. Constrained optimization to train neural networks on critical and under-represented classes. In *NeurIPS*, 2021. 1
